# Supplementary material
Source: PubMed Central journal article supplement (PMC4711836)
Supplement: pnas.1522401112.sapp.pdf [file pnas.1522401112.sapp.pdf]

## **Supplemental Information**

### **Materials and Methods**

#### **MEF medium**

MEF medium consists of Iscove's modified Dulbecco medium (IMDM) containing 10% iron-supplemented calf serum (Hyclone), with additional non-essential amino acids, GlutaMAX™, gentamycin, and beta-mercaptoethanol.

#### **Fibroblast cultures from specific organs**

Embryos from VEGF-GFP transgenic mice were harvested at 18.5 days post-coitus and dissected with micro-scissors under low power microscopy. The organs were minced, trypsinized for 20 minutes and seeded into T-25 cell culture dishes in 10 mL MEF medium as described above. The cells were split at 1:2-1:3 ratios when freshly confluent, passaged 2-4 times, then frozen or expanded for further studies.

#### **Cell sorting**

Cultures of primary fibroblasts at early passages were harvested by trypsinization, washed in phosphate buffered saline (PBS, 137 mM NaCl, 2.7 mM KCl, 10 mM Na<sub>2</sub>HPO<sub>4</sub>, 1.8 mM KH<sub>2</sub>PO<sub>4</sub>), filtered through a 70 μm cell strainer, and re-suspended in PBS at 10<sup>8</sup> cells/mL. Cells were sorted by a MoFlo fluorescence activated cell sorter (Cytomation) and populations were collected into tubes containing complete MEF media. The sorted cells were immediately seeded into cell culture dishes and expanded. The purity of the resulting populations was confirmed by cytometry. Sorting was performed by the Flow Cytometry Core at the Schepens Eye Research Institute, Harvard Medical School.

#### **Electron microscopy**

Primary mouse embryonic cells were cultured to 90% confluence, fixed in Karnovsky solution (4% paraformaldehyde, 5% glutaraldehyde, 80 mM sodium cacodylate pH 7.4)

solution and stored in 0.2 M sodium cacodylate buffer pH 7.4. They were then post-fixed in osmium tetroxide, stained en bloc with uranyl acetate, dehydrated in graded ethanol solutions, infiltrated with propylene oxide/epoxy resin, and embedded in epoxy resin. Thin 1  $\mu\text{m}$  sections were cut, stained with toluidine blue and examined by light microscopy or stained with lead citrate and examined in a Philips 301 electron microscope.

### **Colony isolation**

MEFs were prepared from E18.5 VEGF-GFP mouse embryos. 5000-7000 cells freshly explanted from embryos were seeded in 15 cm culture dishes in MEF cell culture medium containing 20% iron-supplemented calf serum (Hyclone) and allowed to grow for 6-8 weeks with frequent change of MEF cell culture medium. Isolated cell clones with normal morphology were picked under a microscope and plated into 96-well microplates. The picked colonies were expanded and the serum percentage was gradually reduced to 10% during the expansion.

### ***In vitro* differentiation and cytochemistry**

Cells at early passages cultured in complete MEF medium were placed in lineage-specific media for 2-3 weeks. For adipogenic differentiation, the medium of cells that were 2 days post-confluence was replaced with IMDM containing 100  $\mu\text{M}$  indomethacin, 0.5  $\mu\text{M}$  hydrocortisone, 0.5 mM 3-isobutyl-1-methyl-xanthine, 10  $\mu\text{g}/\text{mL}$  Insulin, and 10% calf serum for 2-3 weeks. Cells were stained with Oil Red O for intracellular fat droplets. For osteogenic differentiation, cells were treated with media containing 0.2 mM ascorbic acid, 10 mM beta-glycerophosphate and 0.1  $\mu\text{M}$  dexamethasone, at 80% confluency. Osteoblastic phenotypes were observed over a 2-3 week period and examined by histochemical staining with alizarin red for calcium deposition, alcian blue to visualize proteoglycans, or for alkaline phosphatase activity. For myogenic differentiation, post-confluent cells were cultured in media containing reduced serum (2% calf serum) for 2-3 weeks. Cell morphology was documented with nuclei visualized by 4',6-diamidino-2-phenylindole (DAPI) staining and by indirect immunofluorescence for a muscle cell specific marker, smMHC.

### **Reverse transcription and quantitative PCR**

Total RNA was isolated and reverse transcription (RT) was carried out with an RNeasy RNA extraction kit (Qiagen) and iScript cDNA synthesis kit (Bio-Rad) following the manufacturers' protocols. Briefly, for a 20  $\mu$ L RT reaction, 1  $\mu$ g of total RNA was mixed with 4  $\mu$ L of 5x iScript reaction mix, and 1  $\mu$ L of iScript Reverse Transcriptase, incubated at 25°C for 5 min, followed by extension at 42°C for 30 min and heat inactivation for 5 min at 85°C. Quantitative polymerase chain reaction (PCR) was carried out using an iCycler real-time PCR system (BioRad). Each 20  $\mu$ L reaction mix contained 10  $\mu$ L SYBR Green supermix (Biorad), 5  $\mu$ L containing 10 pmol of primer pair mix, and 5  $\mu$ L of diluted cDNA template (1:10) from the RT-PCR reaction. PCR reaction mixtures were heated at 95°C for 3 min, followed by 45 cycles of amplification (95°C for 10s; 60°C for 30s; 72°C for 30s). A final extension step was performed at 72°C for 10 min. Amplification results were analyzed using iCycler software (iQ5 multicolor optical v2). All primers were identified using the PrimerBank database (1).

### **Immunofluorescence**

Cells were harvested by trypsinization, re-suspended at  $10^7$  cells/mL in FACS buffer (0.1% bovine serum albumin (BSA) and 0.1% sodium azide in PBS). The use of trypsin as a disaggregation method did not affect the expression pattern of most of the surface proteins observed. Conjugated primary antibodies (1  $\mu$ L) were added to 100  $\mu$ L aliquots of cells in a V-bottom 96-well micro plate, incubated for 40 min on ice, washed twice with FACS buffer and re-suspended in 200  $\mu$ L for cytometry (FACSCalibur, BD Biosciences) following the manufacturers' instructions. For multicolor flow cytometric analysis, cells were exposed to fluorochrome-conjugated antibodies recognizing CD54 (Pacific blue), Sca-1 (BV-510), CD73 (BV-605), CD80 (BV-650), CD24 (PE-CF594), CD140a (PE), CD71 (PE/Cy7), CD38 (PE/Cy7), CD120a (APC), CD107a (APC-Cy7), CD146 (APC), and CD90.1 (AF-700) in various combinations and fixed samples were analyzed on a FACS-Aria (BD Biosciences) at the Harvard Stem Cell Institute core facility. For multicolor flow cytometry of fibroblasts from embryonic organs, extracted organs were minced into small pieces and digested using Liberase™ DL collagenases

(Roche) and DNase I (Roche) in Hanks' balanced salt solution (HBSS, 138 mM NaCl, 5.33 mM KCl, 1.26 mM CaCl<sub>2</sub>, 4 mM NaHCO<sub>3</sub>, 0.3 mM Na<sub>2</sub>HPO<sub>4</sub>, 0.44 mM KH<sub>2</sub>PO<sub>4</sub>, 0.5 mM MgCl<sub>2</sub>, 0.41 mM MgSO<sub>4</sub>, 5.6 mM glucose) by incubating for 20-30 minutes in a CO<sub>2</sub> incubator at 37°C. Digested tissues were passed through a 100 µm mesh to obtain single cell suspensions. Fc receptors were blocked and cells were stained for flow cytometric analyses. A complete list of antibodies is presented in Table S7.

### **Confocal microscopy**

To visualize intracellular proteins, cells were seeded in chamber slides (BD Falcon) and grown to 60-80% confluence. Cells were then fixed with 4% paraformaldehyde in PBS for 20 min, permeabilized and blocked with 0.1% Triton X-100 in blocking solution (0.2% bovine serum albumin in PBS) for 1 hour, and incubated with primary antibodies for 1 hour at room temperature. Cells were washed 5-6 times by PBS and further incubated with AF594 conjugated corresponding secondary antibodies (Invitrogen) for 45 min, and washed 6-8 times with PBS. The cells were mounted in mounting medium containing DAPI (Vector Laboratories) to stain nuclei, viewed and imaged using a Leica SP5 AOBS scanning laser confocal microscope and LAS AF Lite software. For FAP $\alpha$  staining, cells were permeabilized to improve the sensitivity. Antibodies are listed in Table S7.

### ***In vitro* collagen gel contraction assay**

Cells were trypsinized and re-suspended in Dulbecco's modified Eagle medium (DMEM) to 6 x10<sup>5</sup> cells/mL, then mixed with an equal volume of 3 mg/mL rat collagen type I solution in pre-cooled tubes. 400-500 µL of cells were added to each well of a 24-well plate, using triplicate wells for each sample or a blank collagen gel control sample without cells. After polymerization for 30 min at 37°C, 0.5 mL of medium (DMEM+10% fetal bovine serum) was added and the cells were incubated for 4 hours in a cell culture incubator (37C, 5% CO<sub>2</sub>). The medium was then changed to serum-free DMEM and the plate was incubated overnight. The following day the collagen gels were gently released from the underlying culture dish and the diameters of the gels were measured after 2-6 hours. The degree of collagen gel contraction was recorded as the average of the major and minor axes of the gel, and data were recorded as the percentage of initial gel area.

Measurements from 3 replicate wells were averaged and the standard deviations were calculated.

### **Single cell capture, transcript library preparation and sequencing**

Multiple flow-sorted sub-populations were used for single cell mRNA sequencing. Growing cultures were dislodged using TrypLE™ (Thermo-Fisher) and cells were suspended at 250-500 cells/μL concentration. The cell suspension and Fluidigm C1™ suspension reagent were mixed at 3:2 ratios. 20 μL of mix was loaded onto a C1™ IFC. RNA extraction and mRNA amplification were performed for single cells in the C1™ micro-fluidics system using the Clontech SMARTer system and according to the manufacturers' recommendations. Amplified cDNA products were quantified by PicoGreen® (Thermo-Fisher) assay and adjusted to 0.1-0.3 ng/ml. cDNA products were prepared for sequencing using a Nextera XT-DNA sample preparation kit from Illumina. Up to 96 libraries were multiplexed per sequencing run.

### **Clustering and single cells gene expression data analysis**

The R package Seurat (2) was used to generate cell population clusters. Principle component analysis was performed on genes present in at least 5 cells with an expression value of one count per million mapped reads. Ten statistically significant principal components were identified using a permutation test. Individual cells were projected based on their principle component scores onto a two dimensional plot using t-distributed stochastic neighbor embedding (t-SNE) (3). Violin density plots of gene expression levels for individual genes were generated using the Seurat package. Gene lists of the most variable expressed genes and of the best gene markers defining identified cell populations were generated.

### **Mouse cranial window preparation, implantation, and two-photon microscopy**

All animal studies were conducted following protocols approved by the Institutional Animal Care and Usage Committee of Massachusetts General Hospital. Mouse cranial windows were prepared as described (4). In brief, mice were anesthetized using ketamine and xylazine and the head was fixed in a stereotactic frame. A disk of skin from the top

of the skull was removed after making a longitudinal incision between the occiput and the forehead. The periosteum was removed and a 6 mm circle was drawn over frontal and parietal regions of the skull. A groove was gradually grinded around the circle and the bone flap was separated from the dura mater while continuously rinsing the dura mater with sterile saline. Dura and arachnoid membranes were completely cut from both hemispheres using microscissors. Without damaging the sagittal sinus, unlabeled GFP-negative cells and GFP-labeled HUVECs were co-implanted in the center of the exposed region. A 7 mm round cover glass was fixed to the bone using cyanoacrylate glue. After several days the cranial windows were examined by two-photon microscopy using anesthetized mice immobilized in a stereotactic stage. Tetramethylrhodamine dextran was used to visualize newly formed vessels along with green HUVECs. In a separate set of experiments, co-implanted DsRed-labeled GFP-negative cells and unlabeled HUVECs were observed.

### **VEGFA Expression Analysis**

One million cells were seeded in 100 mm culture plates and at day 3 media supernatants were replaced with medium containing 0.5% serum. Forty eight hours later culture supernatants were collected and centrifuged to discard any cell debris. An antibody cytokine array measurement was performed according to the manufacturer's instructions (RayBiotech). Biotinylated antibodies to cytokines were detected using IRDye-680 labeled streptavidin (Li-Cor Biosciences, Lincoln NE). The array was disassembled, washed, dried, and scanned using a Li-Cor Odyssey detector.

### **Supplemental References**

1. Spandidos A, Wang X, Wang H, & Seed B (2010) PrimerBank: a resource of human and mouse PCR primer pairs for gene expression detection and quantification. *Nucleic acids research* 38(Database issue):D792-799.
2. Satija R, Farrell JA, Gennert D, Schier AF, & Regev A (2015) Spatial reconstruction of single-cell gene expression data. *Nature biotechnology* 33(5):495-502.
3. van der Maaten L, and Hinton, G. (2008) Visualizing Data using t-SNE. *J. Mach. Learn. Res.* 9:2579–2605.
4. Brown E, Munn LL, Fukumura D, & Jain RK (2010) In vivo imaging of tumors. *Cold Spring Harbor protocols* 2010(7):pdb prot5452.

## Supplemental Figure Legends

### **Fig. S1. Primary fibroblasts from VEGF-GFP transgenic embryos.**

Fibroblasts from the VEGF-GFP mouse embryos at stages E12.5 and E18.5 were isolated and cultured as described in Materials and Methods. (A) Fibroblasts from E12.5 embryos at passage 28 (1) or from E18.5 embryos at passage 30 (2) were analyzed by phase contrast microscopy. (B) A cytokine assay was performed on culture supernatants of GFP-positive and GFP-negative cells as described in SI Materials and Methods. GFP-positive cells showed higher levels of VEGFA compared to GFP-negative cells.

### **Fig. S2. ES cell and NIH3T3 fibroblast expression of antigens used to assess multipotency potential.**

Wild-type mouse ES cells or NIH3T3 fibroblast cells were cultured in chamber slides (BD Falcon) for 1-2 days before fixation and permeabilization. Antigens were visualized by indirect immunofluorescence using antibodies to Fra-1, Pax-7, Nanog, Klf-4, NST, cMyc, Nestin, Cox-2, Sox-2, and Oct-4 as described in SI Materials and Methods. Images acquired with a Leica SP5 AOBS confocal microscope show antibody (red), and DNA (blue) as well as merged images. All antigens are present in ES cells (A), but not NIH3T3 fibroblasts (B). NIH3T3 fibroblasts express only NST and Fra-1.

### **Fig. S3. Phenotypic comparisons of GFP-negative and GFP-positive cells.**

GFP-negative and positive cells from E18.5 VEGF-GFP transgenic mice were sorted for GFP expression, cultured in chamber slides (BD Falcon) and grown to 60-80% confluence before fixation and permeabilization. (A and B) Expression of pluripotency markers. GFP-negative and positive cells show a nucleolar specific staining for NST, nuclear staining for Fra-1, and an intermediate filament specific staining for Nestin. Expression of NST and Nestin was higher in GFP-negative cells whereas Fra-1 expression was higher in GFP-positive cells. Most of the ES-specific markers, (Oct-4, cMyc, Sox-2, Pax-7, Cox-2, Klf-4, and Nanog) were absent from both cell types. Images

were acquired with a confocal microscope, and color coded by antibody reactivity (red), DNA content (blue), and GFP presence (green).

**Fig. S4. Localization of fibroblast, contractile protein and intermediate filament antigens.**

GFP-negative and positive cells from E18.5 VEGF-GFP transgenic mice were sorted for GFP expression, cultured in chamber slides (BD Falcon) and grown to 60-80% confluence before fixation and permeabilization. (A and B) Cells were visualized by indirect immunofluorescence with antibodies recognizing sM22 $\alpha$  (*Tagln*),  $\alpha$ SMA (*Acta2*), desmin (*Des*), vimentin (*Vim*), smMHC (*Myh11*), ER-TR7, and FAP $\alpha$  as described in SI Materials and Methods. GFP-negative cells express myofibroblast antigens (sM22 $\alpha$  and  $\alpha$ SMA), the mesenchymal cell antigen vimentin and the fibroblast antigen FAP $\alpha$ , but not the myofibroblast and mature muscle cell antigens desmin and smMHC. GFP-positive cells express the ER-TR7 antigen but GFP-negative cells do not (Fig. S4B).

**Fig. S5. Phenotypic characterization of colonies from E18.5 embryonic fibroblast-like cells.**

(A) Colonies show normal morphology by phase contrast microscopy. (B) Flow-cytometric analyses of GFP expression by clones. Three clones, A6, B3, and D1 express GFP.

**Fig. S6. Multipotency of cells from single colonies**

Quantitative RT-PCR analyses of cells expanded from single colonies and exposed to media inducing differentiation into three lineages. The expanded cells exhibited varying degrees of susceptibility to the inducing media.

**Fig. S7. FAP $\alpha$  expression identifies a subpopulation of cells from embryonic organs.**

Fibroblast-like cells were identified by anti-FAP $\alpha$  reactivity. Single cell suspensions were prepared from E18.5 embryo organs. The cells were treated with Fc $\gamma$ RII/RIII block and stained with FAP $\alpha$  antibody. Cells were washed three times and incubated with donkey



anti-rabbit secondary antibody. Cells were washed, fixed, and subjected to flow-cytometry. All organs contained anti-FAP $\alpha$  reactive cells.

**Fig. S8. FAP $\alpha$  expression by fibroblasts cultured from embryonic organs.**

Fibroblast-like cells were expanded from multiple embryonic organs in culture. The cells were stained with anti-FAP $\alpha$  antibody. Fibroblast populations from most of the organs were almost entirely FAP $\alpha$  positive. Fibroblasts from heart tissue contained a significant population that did not express FAP $\alpha$ . Red, isotype control; blue, anti- FAP $\alpha$ .

**Fig. S9. Phenotypic diversity within fibroblasts cultured from embryonic organs.**

Preparations of fibroblasts derived from 13 embryonic organs were incubated with CD24 (PE-CF594) and CD120a (APC) antibodies and analyzed by flow cytometry. The data were analyzed using FlowJo software. Substantial heterogeneity was observed among the analyzed populations.

**Fig. S10. Histochemistry and RT-PCR analysis of GFP-negative cells.**

Cells induced to differentiate were examined by cytochemistry using specific dyes, by reactivity with anti-smMHC antibody and by qRT-PCR as described in SI Materials and Methods. (A) Adipogenic, osteogenic, and myogenic differentiation of GFP-negative and GFP-positive cells. Panel 1 and 5, Oil Red O staining for fat droplets in cells exposed to adipogenic or conventional medium. Panels 2-4 and 6-8, staining with alcian blue, alizarin red or for alkaline phosphatase activity in cells exposed to osteogenic or conventional medium. Panel 9, myogenic differentiation of GFP-negative cells visualized with an antibody recognizing smMHC. (B) qRT-PCR analyses of GFP-negative and GFP-positive cells from E12.5 and E18.5 embryos undergoing *in vitro* differentiation. For myogenic induction, cells were exposed to myogenic induction or conventional medium and qRT-PCR was performed for smooth muscle-specific markers sm22 $\alpha$  (*Tagln*), smMHC (*Myh11*), desmin (*Des*), vimentin (*Vim*),  $\alpha$ Tropomyosin (*Tpm1*),  $\alpha$ SMA (*Acta2*), and caldesmon (*Cald1*). GFP-negative cells exposed to induction medium express elevated levels of these markers (B, 4 and C, 4). For osteogenic induction, cells were exposed to osteogenic induction or conventional medium. GFP-negative fibroblasts

showed a robust increase in the abundance of *runx2* (*Runx2*), osteocalcin (*Bglap*), osteonectin (*Sparc*), osteopontin (*Spp1*) and alkaline phosphatase transcripts (*Alpl*) (*B*, 5 and *C*, 5). The abundance of these transcripts in GFP-positive cells was unchanged (*B*, 2 and *C*, 2). For adipogenic induction, GFP-negative and GFP-positive fibroblasts were exposed to adipogenic or conventional medium and analyzed by qRT-PCR. The transcript abundance of aP2 (*Fabp4*), CEBP $\alpha$  (*Cebpa*) and PPAR $\gamma$  (*Pparg*) genes increased in GFP-negative cells (*B*, 6 and *C*, 6) compared to GFP-positive cells (*B*, 3 and *C*, 3).

**Fig. S11. Flow cytometric analyses of GFP-negative cells.**

Cytometric analyses of GFP-negative cells for a panel of cell surface markers following differentiation into three lineages. Flow sorted and expanded GFP-negative cells were differentiated into osteogenic, myogenic, and adipogenic lineages in the respective induction media. Surface markers were analyzed by flow cytometry for differentiated cells (blue) and compared to undifferentiated cells (red). Expression of CD44, CD80, CD120a, and CD121 was reduced in all cases. Expression of CD24, CD38, and CD106 was reduced in some conditions whereas CD29, CD90.1, CD140a, Sca-1, and PDPN were little affected. CD36 expression appeared following adipogenic differentiation.

**Fig. S12. Smooth muscle cell phenotype of GFP-negative cells.**

(A) Light micrographs of GFP-negative cultures labeled by expression of dsRED visualized by phase contrast (1) or in the red channel (2). (B) *In vitro* collagen contraction was measured as described in SI Materials and Methods. A 24-well plate with 200,000 or 400,000 cells/well cultured inside 1.5% collagen gels for 24 h is shown. The adjacent graph shows the calculated change in area of the collagen gel. GFP-negative cells contracted collagen gels whereas GFP-positive cells did not. (C) Morphologies of cells cultured in the Matri-gel SMC culture system (BD Biosciences) in induction media for 2 days. Differentiated smooth muscle morphologies were observed for E12.5 cells from VEGF-GFP embryos (1), and 10T1/2 cells (2). The GFP-positive subpopulation from the E18.5 cells at passage 6 (3) or 34 (4) did not show smooth muscle morphology. (D) Cells were cultured in Matrigel (BD Biosciences) in induction medium for 2 days.

Immunofluorescence analysis of smooth muscle specific caldesmon (SM caldesmon) was performed as described in SI Materials and Methods. Images are of WT-FVB-E12.5 (1, 2) and C3H10T1/2 (3, 4).

**Table S1. Similarities of GFP-positive and GFP-negative populations from E18.5 day fibroblast-like cells.**

| CD     | GFP (+) | GFP (-) | CD   | GFP (+) | GFP (-) | CD          | GFP (+) | GFP (-) |
|--------|---------|---------|------|---------|---------|-------------|---------|---------|
| 3a     | -       | -       | 54   | +       | +       | 127         | -       | -       |
| 4      | -       | -       | 66a  | +       | +       | 133         | -       | -       |
| 9      | +++     | +++     | 71   | +       | +       | 135         | -       | -       |
| 11b    | -       | -       | 73   | +       | +       | 140a        | ++      | ++      |
| 14     | +       | +       | 80   | ++      | ++      | 144         | -       | -       |
| 18     | -       | -       | 81   | ++      | ++      | 146         | ++      | +       |
| 19     | -       | -       | 86   | -       | -       | 150         | -       | -       |
| 24     | +++     | +++     | 88   | -       | -       | 196         | -       | -       |
| 29     | +++     | +++     | 90.1 | +++     | +++     | 202         | -       | -       |
| 30     | -       | -       | 90.2 | -       | -       | 226         | -       | -       |
| 31     | -       | -       | 96   | -       | -       | 309         | -       | -       |
| 34     | +       | +       | 105  | +       | +       | Podoplanin  | ++      | ++      |
| 36     | -       | -       | 106  | ++      | ++      | Tra-1-81    | -       | -       |
| 38     | ++      | ++      | 107a | +       | +       | Sca-1       | +++     | +++     |
| 44     | ++      | ++      | 117  | -       | -       | SSEA-1, 3   | -       | -       |
| 45     | -       | -       | 120a | ++      | ++      | MHC-II      | -       | -       |
| 45R    | -       | -       | 121  | ++      | ++      | DLL1, DLL4  | -       | -       |
| 48     | -       | -       | 122  | -       | -       | FcεRI-α     | -       | -       |
| 49b, d | -       | -       | 123  | -       | -       | Pan NK cell | -       | -       |

The CD or other antigens analyzed by flow cytometry are shown at left, with a scoring of expression intensity between – and +++.

**Table S2. Fibroblast colonies from E18.5 VEGF-GFP transgenic mice.**

| 150 mm Plates | Smaller Colonies<br>(up to 1mm) | Bigger Colonies<br>(>1mm) | Total number<br>of Colonies | Efficiency<br>(%) |
|---------------|---------------------------------|---------------------------|-----------------------------|-------------------|
| 1             | 32                              | 8                         | 40                          | 0.80              |
| 2             | 29                              | 3                         | 31                          | 0.62              |
| 3             | 41                              | 6                         | 47                          | 0.94              |
| 4             | 40                              | 7                         | 47                          | 0.78              |
| 5             | 54                              | 8                         | 62                          | 0.83              |

$$\text{Cloning Efficiency} = \frac{\text{Total number of colonies}}{\text{Total number of cells seeded}}$$

Final colony formation efficiency: 0.8 %

Total number of colonies that could be transferred from 96-well plate: 34

Total colonies that could be expanded: 20

Number of GFP+ colonies expanded: 3

5000-7000 fibroblast-like cells isolated from E18.5 VEGF-GFP transgenic mouse embryo were plated in 150 mm cell culture dishes with complete MEF medium supplemented with 20% CS plus iron (Hyclone) and allowed to grow for 6-8 weeks with frequent changes of medium. Colonies were counted and the cloning efficiency calculated as described in the Materials and Methods.

**Table S3. GFP-negative populations derived from single colonies *in vitro* exhibit heterogeneous cell surface protein expression patterns.**

| CD/<br>Clones | A1  | A2  | A3  | A4  | B1  | B4  | B5  | B6  | C1  | C3  | C4  | C5  | A6  | B3  | D1  |
|---------------|-----|-----|-----|-----|-----|-----|-----|-----|-----|-----|-----|-----|-----|-----|-----|
| 14            | +   | -   | +   | -   | -   | +   | +   | +   | -   | +   | +   | -   | +   | -   | -   |
| 18            | -   | -   | -   | -   | -   | -   | -   | -   | -   | -   | -   | -   | -   | -   | -   |
| 24            | +   | -   | ++  | +   | +++ | +++ | +   | +++ | +++ | +   | +++ | ++  | +   | ND  | ++  |
| 29            | +++ | +++ | +++ | +++ | +++ | +++ | +++ | +++ | +++ | +++ | +++ | +++ | ++  | +++ | ++  |
| 34            | -   | +   | -   | +   | -   | -   | -   | +   | -   | -   | +   | +   | -   | -   | +   |
| 38            | -   | +   | ++  | +   | +   | ++  | ++  | +   | ++  | +   | +   | +   | +   | ND  | +   |
| 44            | ++  | ++  | ++  | ++  | ++  | ++  | ++  | ++  | ++  | ++  | ++  | ++  | ++  | ++  | ++  |
| 54            | +   | ND  | ND  | +   | ND  | -   | +   | ND  | -   | -   | +   | -   | -   | -   | -   |
| 66a           | -   | +   | +   | ND  | +   | ++  | +   | +   | +   | ND  | +   | +   | +   | ND  | +   |
| 71            | +   | +   | +   | +   | +   | +   | +   | ++  | +   | +   | +   | +   | -   | +   | -   |
| 73            | -   | -   | -   | -   | +   | -   | -   | +   | -   | -   | -   | -   | -   | -   | -   |
| 80            | +   | +   | +   | +   | +   | +   | +   | ++  | +   | ++  | +   | +   | +   | +   | +   |
| 81            | +++ | +++ | +++ | +++ | +++ | +++ | +++ | +++ | +++ | +++ | +++ | +++ | +++ | ++  | +++ |
| 86            | -   | -   | -   | -   | -   | -   | -   | -   | -   | -   | -   | -   | -   | -   | -   |
| 90.1          | -   | +++ | -   | ++  | +++ | +++ | ++  | +   | +   | +   | +++ | +++ | +   | -   | +   |
| 90.2          | -   | -   | -   | -   | -   | -   | -   | -   | -   | -   | -   | -   | -   | -   | -   |
| 105           | ++  | ++  | ++  | +   | ++  | -   | -   | -   | ++  | -   | -   | +   | -   | -   | -   |
| 106           | +++ | +++ | +++ | +++ | +++ | +++ | +++ | +++ | +++ | +++ | +++ | +++ | ++  | ++  | ++  |
| 107a          | +   | +   | ++  | ND  | +   | +   | +   | ++  | +   | ND  | ND  | +   | +   | ND  | +   |
| 117           | -   | -   | -   | -   | -   | -   | -   | -   | -   | -   | -   | -   | -   | -   | -   |
| 120a          | +   | +   | +   | ++  | +   | +   | +   | +   | +   | +   | +   | +   | +   | +   | -   |
| 140a          | +   | +   | ++  | ++  | ++  | +   | ++  | +   | ++  | +   | ++  | +   | +   | +   | +   |
| Sca-1         | +++ | +++ | +++ | +++ | +++ | +++ | +++ | +++ | +++ | +++ | +++ | +++ | +++ | +   | ++  |
| PDPN          | ++  | +   | -   | +   | +   | ++  | -   | +++ | -   | ++  | +   | ++  | +   | ND  | +   |

Qualitative reactivity summary (ND) Not Determined.

**Table S4. Genes shown in heat map**

|         |          |               |          |           |               |          |
|---------|----------|---------------|----------|-----------|---------------|----------|
| Cwc22   | Msr1     | Crip1         | Al607873 | Tlr8      | Glpr1         | Ccl12    |
| Adgre1  | Myo1f    | Gmfg          | Evi2a    | Casp1     | Ifi2712a      | Cd72     |
| Alox5ap | Ncf4     | Hpgds         | Il10rb   | Cyth4     | Rassf4        | Tmem104  |
| C3ar1   | Nckap1l  | Lat2          | Ehd4     | Dok2      | Cx3cr1        | Bin2     |
| Capg    | Pira6    | Ms4a7         | Sec11c   | Hmha1     | Pkib          | Aif1     |
| Ccl3    | Pirb     | Blnk          | Unc93b1  | Lair1     | Rhog          | Ptpn18   |
| Cd14    | Pld4     | Btk           | Slc7a8   | Lrmp      | Ncf1          | Ifi30    |
| Cd53    | Plek     | Clec4a2       | Aldh3b1  | Tlr7      | Csf2rb        | Irf8     |
| Cd68    | Ptprc    | Coro1a        | Lyn      | Tnfaip8l2 | Trpv2         | Lgals9   |
| Clec12a | Rac2     | Fxyd5         | Ctsb     | Cybb      | 2610203C22Rik | Pik3r5   |
| Clec4d  | Rgs1     | Lmo2          | Grn      | Dok3      | Gpsm3         | Prex1    |
| Clec5a  | Tmem106a | Srgn          | Milr1    | Dpep2     | Rufy3         | Mfap2    |
| Ctss    | Trem2    | Blvrb         | Prkcd    | Sash3     | Abhd12        | 15000150 |
| Fcer1g  | Tyrobp   | C5ar1         | Pon3     | Shtn1     | Mgat4a        | 10Rik    |
| Fyb     | Adam8    | Ccl4          | Adcy7    | Tlr13     | Dgkz          | Sod3     |
| Id2     | Ccl9     | Ctsc          | Cxcl16   | Wdfy4     | Man2b1        | Emb      |
| Itgam   | Cfp      | Efhd2         | Lgals3   | Fli1      | Emilin2       | Agtr2    |
| Laptm5  | Cyba     | Gcnt1         | Plxnc1   | Lpxn      | Lipa          | Srpx     |
| Cwc22   | Gp49a    | H2-D1         | Psmb8    | P2ry6     | Zfp710        | Itm2a    |
| Adgre1  | Lilra6   | Igsf6         | Smpdl3a  | Slc37a2   | Tep1          | Sfrp2    |
| Alox5ap | Mpeg1    | Fcgr2b        | Ms4a6c   | Atf3      | Cd93          | Nov      |
| C3ar1   | Nrros    | Gpr137b-ps    | Lgmn     | Il2rg     | Hhex          | Thbs2    |
| Capg    | Pf4      | Sirpa         | Cd84     | Lst1      | Gpr137b       | Tnfaip6  |
| Ccl3    | Ptpn6    | Gatm          | Csf2ra   | Pik3cg    | Arhgef6       | Wdr62    |
| Cd14    | AF251705 | 1110007C09Rik | Gusb     | C1qc      | Cndp2         | Ccl2     |
| Cd53    | Cd37     | Arhgap30      | Ninj1    | Nfam1     | H2-K2         | Polq     |
| Cd68    | Cotl1    | H2-K1         | Rgs2     | Slc27a1   | Psmb10        | Mxd3     |
| Clec12a | Csf1r    | Al662270      | Anpep    | Glul      | Elmo1         | Ccnf     |
| Clec4d  | Ctsz     | Lcp2          | Creg1    | BC005537  | Samhd1        | Actg2    |
| Clec5a  | Dab2     | Apobec1       | Ucp2     | Ncf2      | Sp110         | Ecscr    |
| Ctss    | Fcgr3    | Itgb2         | Slc43a2  | Pid1      | Arhgap9       | Brip1os  |
| Fcer1g  | Fermt3   | Ms4a6b        | Ppm1h    | Pip4k2a   | Ikzf1         | E2f7     |
| Fyb     | Lyz1     | Cadm1         | Bhlhe41  | Cxcr4     | Cd200r1       | Mcm10    |
| Id2     | Lyz2     | Mafb          | Adap2    | Itga6     | Grb2          | Rbl1     |
| Itgam   | Pira2    | Syk           | Spi1     | Trim30a   | Hcls1         | Gm16702  |
| Laptm5  | Plin2    | Blvra         | Dock2    | Mrc1      | Arl11         | Lcmt2    |
| Lcp1    | Slnf2    | Nceh1         | Fxyd2    | Irf5      | Fmnl1         | Gm10190  |
| Lilrb4  | Stab1    | Ctsd          | Inpp5d   | Rgs10     | Myo1g         | Prelp    |
| Ms4a6d  | Cd36     | H2-Q2         | Stom     | Arrb2     | Oas1a         |          |

**Table S5. Highly variable genes in single cell analysis.**

|               |           |         |               |          |           |
|---------------|-----------|---------|---------------|----------|-----------|
| 1110032A03Rik | Adgrd1    | C1qa    | Col5a3        | Eid3     | Igf2bp1   |
| 1600010M07Rik | Adgre1    | C1qb    | Coro1a        | Elf1     | Igfbp3    |
| 1700024P16Rik | Adgrg2    | C1qc    | Cox5b         | Elf4     | Igfbp5    |
| 1700093K21Rik | Adipoq    | Cables2 | Cpeb1         | Elmo1    | Irf2bpl   |
| 1810022K09Rik | Adipor2   | Cadm1   | Cpeb2         | Enho     | Irf3      |
| 2010315B03Rik | Agbl3     | Camta2  | Cpeb3         | Enox2    | Itga7     |
| 2210408F21Rik | Agfg2     | Car3    | Cpsf4         | Erich5   | Itrip12   |
| 2310039H08Rik | Agpat2    | Ccdc136 | Csf1r         | Ero1l    | Jade3     |
| 2410015M20Rik | Agps      | Ccl12   | Csrnp1        | Etfa     | Jazf1     |
| 2610507I01Rik | Ahdc1     | Ccl3    | Ctcf          | Evc      | Kat6b     |
| 2700099C18Rik | Akap17b   | Ccl4    | Ctsh          | Evi5     | Kctd6     |
| 2810417H13Rik | Aldh3b2   | Ccl6    | Cul7          | Exoc2    | Kdm6b     |
| 2900060B14Rik | Aldh3b3   | Ccny    | Cx3cr1        | Exoc5    | Kif13a    |
| 3300005D01Rik | Amacr     | Ccr1    | Cxadr         | Exoc8    | Kif1a     |
| 4921504A21Rik | Amotl2    | Ccr12   | Cxcl2         | F13a1    | Kif3a     |
| 4930427A07Rik | Anapc13   | Cd2bp2  | Cybb          | Fabp3    | Kif4      |
| 4930431F12Rik | Anapc2    | Cd36    | Cyp2j9        | Fabp4    | Kiz       |
| 4930512M02Rik | Ankrd13a  | Cd48    | D830005E20Rik | Fahd2a   | Klhdc10   |
| 4933400A11Rik | Ankrd16   | Cd72    | Dagla         | Fam111a  | Klhdc3    |
| 4933400F21Rik | Ap4e1     | Cd74    | Dars          | Fam122b  | Klhl2     |
| 6330416G13Rik | Apbb3     | Cdkn1c  | Dcun1d5       | Fam129a  | Klhl5     |
| 6330549D23Rik | Apoe      | Cenpb   | Ddt           | Fam133b  | Kpna4     |
| 9330158H04Rik | Apol6     | Cenpw   | Dennd4a       | Fam160b2 | Krtcap2   |
| 9430015G10Rik | Arap3     | Cep128  | Dgcr6         | Fam172a  | Lat2      |
| 9430037G07Rik | Arfgef2   | Cfd     | Dhx9          | Fam43a   | Lcn2      |
| A230057D06Rik | Arhgap11a | Cfp     | Dis3          | Fancm    | Lig1      |
| A630020A06    | Arl4c     | Chd3    | Dis3l2        | Fbxo45   | Lincppara |
| A830080D01Rik | Arpp21    | Cherp   | Dmpk          | Fbxw8    | Lipe      |
| AI450353      | Atg3      | Chl1    | Dmxl1         | Fcgr2b   | Lrch1     |
| AU041133      | Atp1a2    | Chrdl1  | Dnajc17       | Fcgr3    | Lrp10     |
| AY512931      | Atp2b4    | Chrna1  | Dnm1          | Fcrls    | Lrpprc    |
| Abhd17b       | Atp6v0a2  | Chrnd   | Dnm3          | Fez2     | Lrrc27    |
| Acadsb        | Atxn7l3b  | Ciao1   | Dnmbp         | Fhod1    | Lrrtm2    |
| Acox1         | Avl9      | Cidec   | Dok2          | Firre    | Luzp2     |
| Acrbp         | B3gat3    | Clcn2   | Dsel          | Fkbp5    | Lym5      |
| Acsl1         | Banp      | Clcn7   | Dus3l         | Folr2    | Lym9      |
| Acsl5         | Bard1     | Clic4   | Dusp16        | Frmd4b   | Lyz1      |
| Acta1         | Basp1     | Cmas    | Dut           | Fzd3     | Magohb    |
| Actc1         | Bet1l     | Cnr1    | Dzip3         | G2e3     | Malt1     |
| Actr1b        | Blzf1     | Cntn1   | E030024N20Rik | Gabbr1   | Man2a1    |
| Adam8         | Brd9      | Cog1    | E2f5          | Galnt10  | Map2      |
| Adgra2        | Bri3      | Col4a4  | Egfl6         | Gart     | Mapkap1   |



|         |         |          |          |           |
|---------|---------|----------|----------|-----------|
| March6  | Nkd2    | Plxna2   | Tbc1d32  | Ubtcd2    |
| Mcidas  | Nkiras1 | Pnir     | Tcof1    | Ugt1a6a   |
| Med15   | Notch1  | Pnpla2   | Tenm3    | Unkl      |
| Meis3   | Npat    | Pnpla7   | Tgfb1    | Usp48     |
| Mettl22 | Npl     | Pogk     | Thg1l    | Uxs1      |
| Mfap1b  | Nptx1   | Pomgnt1  | Timm10b  | Vac14     |
| Mib2    | Npy     | Pou2f1   | Tktl1    | Vat1      |
| Mid1    | Nrcam   | Ppm1k    | Tll1     | Vegfc     |
| Mkx     | Nrk     | Ppp1r2   | Tln2     | Vmn2r55   |
| Mlec    | Nrxn1   | Ppp2r4   | Tlr13    | Vps37a    |
| Mlph    | Nt5c2   | Pqlc1    | Tmc4     | Vps51     |
| Mmp12   | Numbl   | Pqlc2    | Tmed9    | Vps53     |
| Mmp16   | Oasl2   | Prex2    | Tmem131  | Vsig10l   |
| Moxd1   | Odc1    | Prkd1    | Tmem138  | Wdpcp     |
| Mpdz    | Odf2    | Prkd2    | Tmem173  | Wdr46     |
| Mpeg1   | Olfml2a | Prrc1    | Tmem192  | Wdr7      |
| Mrap    | Osbpl6  | Psg29    | Tmem203  | Wfdc17    |
| Mrc1    | Palm2   | Ptchd4   | Tmem70   | Wrnip1    |
| Mrpl16  | Pam     | Ptges3l  | Tmem8    | Yod1      |
| Mrpl36  | Pan2    | Ptpn4    | Tmem82   | Yrdc      |
| Mrps31  | Papola  | Pus10    | Tmem8c   | Zbtb44    |
| Ms4a7   | Parp14  | Pxdn     | Tnfrsf1a | Zc3hav1   |
| Mtm1    | Pbk     | Pycr1    | Tnfrsf26 | Zcchc5    |
| Mtpap   | Pcdh20  | Rab20    | Tnmd     | Zdhhc1    |
| Murc    | Pcdhb17 | Rad51    | Tnni1    | Zfand3    |
| Mvk     | Pcdhga8 | Rad54l2  | Tnnt2    | Zfp35     |
| Mxi1    | Pcdhgc5 | Ralgapb  | Trak2    | Zfp397    |
| Myl1    | Pcif1   | Rarb     | Trem2    | Zfp462    |
| Myo18a  | Pcsk5   | Rbm12    | Trf      | Zfp511    |
| Myo1f   | Pdlim7  | Rdm1     | Trim30a  | Zfp608    |
| Myog    | Pdpc1   | Reg1     | Trim39   | Zfp672    |
| Myoz3   | Pdzd7   | Rel      | Trmt12   | Zfp715    |
| Naalad2 | Per2    | Rep15    | Trp53bp2 | Zfp758    |
| Napg    | Phc1    | Rer1     | Trpm3    | Zfp759    |
| Ncf4    | Phc3    | Retn     | Trps1    | Zfp811    |
| Nckap5l | Phf10   | Rfx3     | Tsen2    | Zfp862-ps |
| Ndrp2   | Phf2    | Rlf      | Tsga10   | Zfp9      |
| Ndufa3  | Phyh    | Rmnd5b   | Tspan2   | Zfp944    |
| Ndufa5  | Pigo    | Rnf150   | Ttc39b   | Zhx2      |
| Ndufb2  | Pih1d1  | Rnf166   | Ttc7b    | Zmym5     |
| Ndufc2  | Pik3c2a | Rnf19b   | Ttn      |           |
| Neb     | Plcb4   | Syde2    | U2af2    |           |
| Nes     | Plekho1 | Tbc1d12  | Ube2d2a  |           |
| Ngfrap1 | Plscr3  | Tbc1d22a | Ubr2     |           |

**Table S6. Primers used for qRT-PCR.**

| Gene Name            | F: 5'-3'<br>R: 5'-3'                               |
|----------------------|----------------------------------------------------|
| GAPDH                | GGAGCCAAACGGGTCATCATCTC<br>GAGGGGCCATCCACAGTCTTCT  |
| sM22 $\alpha$        | ACCAAAAACGATGGAAACTACCG<br>CATTGAAGGCCAATGACGTG    |
| smMHC                | AAGCTGCGGCTAGAGGTCA<br>CCCTCCCTTTGATGGCTGAG        |
| Desmin               | GTGGATGCAGCCACTCTAGC<br>TTAGCCGCGATGGTCTCATA       |
| Vimentin             | CTTGAACGGAAAGTGGAATCCT<br>GTCAGGCTTGAAACGTCC       |
| $\alpha$ Tropomyosin | AACGGTGACGAACAACCTTGAA<br>GGAAGTCATATCGTTGAGAGCG   |
| $\alpha$ SMA         | GTCCCAGACATCAGGGAGTAA<br>TCGGATACTTCAGCGTCAGGA     |
| Caldesmon            | GTACACCAATGCAATCGAGGG<br>CCTTCTCCACATGCTCTTGA      |
| sk-MLC2              | TTCAAGGAGGCGTTCCTGTA<br>TAGCGTCGAGTTCCTCATTCT      |
| sk-Myogenin          | CGGCCCTAACAAGAGGAG<br>CAACATCACATCCCTTGGGAC        |
| Runx2                | GAGGCCGCCGCACGACAACCG<br>CTCCGGCCCACAAATCTCAGA     |
| Osteocalcin          | CTGACCTCACAGATCCCAAGC<br>TGGTCTGATAGCTCGTCACAAG    |
| Osteonectin          | ACTACATCGGACCATGCAAATAC<br>GTACAAGGTGACCAGGACATTTT |
| Osteopontin          | AGCAAGAACTCTTCCAAGCAA<br>GTGAGATTCGTGAGATTCATCCG   |
| Collagen I           | GCTCCTCTTAGGGGCCACT<br>CCACGTCTCACCATTGGGG         |
| ALP                  | ATGGGCGTCTCCACAGTAAC<br>CTGAGTGGTGTTCATCGC         |
| aP-2                 | AAGGTGAAGAGCATCATAACCCT<br>TCACGCCTTTCATAACACATTCC |
| CEBP- $\alpha$       | CAAGAACAGCAACGAGTACCG<br>GTCACTGGTCAACTCCAGCAC     |
| PPAR $\gamma$        | TATGGAGTGACATAGAGTGTGCT<br>CCACTTCAATCCACCCAGAAAG  |

**Table S7. Antibodies used for confocal microscopy:**

| Antigen       | Clone      | Manufacturer   | Catalog number | Lot number |
|---------------|------------|----------------|----------------|------------|
| Oct-4         | C30A3      | Cell Signaling | 2840S          | 2          |
| SM22 $\alpha$ | polyclonal | Abcam          | ab14106        | 714669     |
| FAP $\alpha$  | polyclonal | Abcam          | ab53066        | 687932     |
| FAP $\alpha$  | polyclonal | Abcam          | ab28244        | GR132121-8 |
| cMyc          | 9E10       | Abcam          | ab32           | 685668     |
| $\alpha$ SMA  | 1A4        | Sigma-Aldrich  | A5228          | 128K4843   |
| ER-TR7        | ER-TR7     | Abcam          | ab51824        | 764760     |
| Nucleostemin  | polyclonal | Abcam          | ab32682        | 699588     |
| Nestin        | 401        | Abcam          | ab11306        | 724974     |
| Pax-7         | EE-8       | SantaCruz      | sc81975        | I2809      |
| Fra-1         | N-17       | SantaCruz      | sc183          | I0809      |
| Cox-2         | 33/Cox-2   | BD             | 610203         | 42936      |
| Nanog         | M-17       | SantaCruz      | sc30329        | H0609      |
| Sox-2         | H-65       | SantaCruz      | sc20088        | H2109      |
| Klf-4         | T-16       | SantaCruz      | sc12538        | E2909      |
| smMHC         | G-4        | SantaCruz      | sc6956         | H0508      |
| Desmin        | RD301      | BD             | 550626         | 32619      |
| Vimentin      | VIM-13.2   | Sigma-Aldrich  | V5255          | 068K4808   |

Antibodies used for flow cytometry:

| Antigen | Clone            | Manufacturer | Fluorescent dye | Catalog number | Lot number |
|---------|------------------|--------------|-----------------|----------------|------------|
| CD4     | GK1.5            | Biologend    | APC             | 100411         | B161912    |
| CD9     | MZ3              | Biologend    | PE              | 124805         | B124956    |
| CD11b   | M1/70            | Biologend    | APC             | 101211         | B171230    |
| CD14    | Sa 14.2          | Biologend    | APC             | 123311         | B155594    |
| CD18    | C71/16           | BD           | PE              | 553293         | M054690    |
| CD19    | 6D5              | Biologend    | PE              | 115508         | B120253    |
| CD24    | M1/69            | Biologend    | APC             | 101813         | B135111    |
| CD29    | HM $\square$ 1-1 | Biologend    | APC             | 102215         | B147686    |
| CD30    | mCD30.1          | eBioscience  | PE              | 12-0301-81     | E016831    |
| CD31    | 390              | Biologend    | APC             | 102409         | B144752    |
| CD34    | HM34             | Biologend    | APC             | 128611         | B146666    |
| CD36    | HM36             | Biologend    | APC             | 102611         | B129606    |
| CD38    | 90               | Biologend    | APC             | 102712         | B148373    |
| CD44    | IM7              | Biologend    | APC             | 103011         | B146670    |
| CD45    | 30-F11           | Biologend    | PE              | 103105         | B122071    |
| CD48    | HM48-1           | Biologend    | PE              | 103411         | B130533    |
| CD54    | YN1/1.7.4        | Biologend    | APC             | 116119         | B143429    |
| CD66a   | MAb-CC1          | Biologend    | PE              | 134505         | B124593    |
| CD71    | R17217           | eBioscience  | PE              | 12-0711-81     | E020852    |
| CD73    | TY/23            | BD           | PE              | 550741         | 37675      |
| CD80    | 16-10A1          | Biologend    | APC             | 104713         | B157138    |

Fig. S1

A

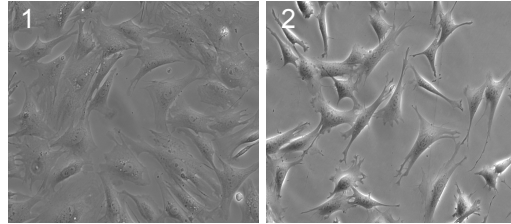

B

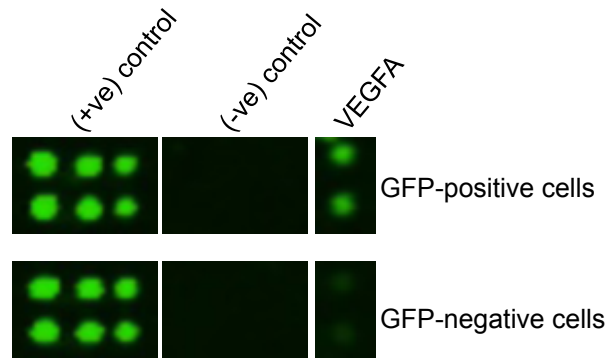

Fig. S2

A

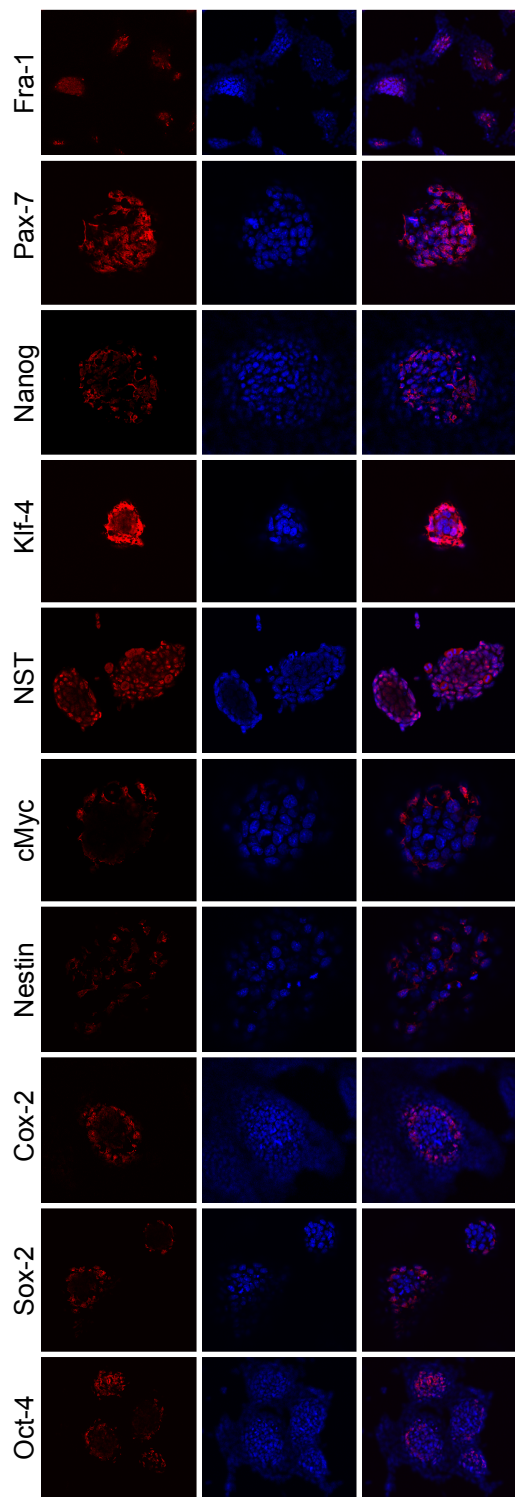

B

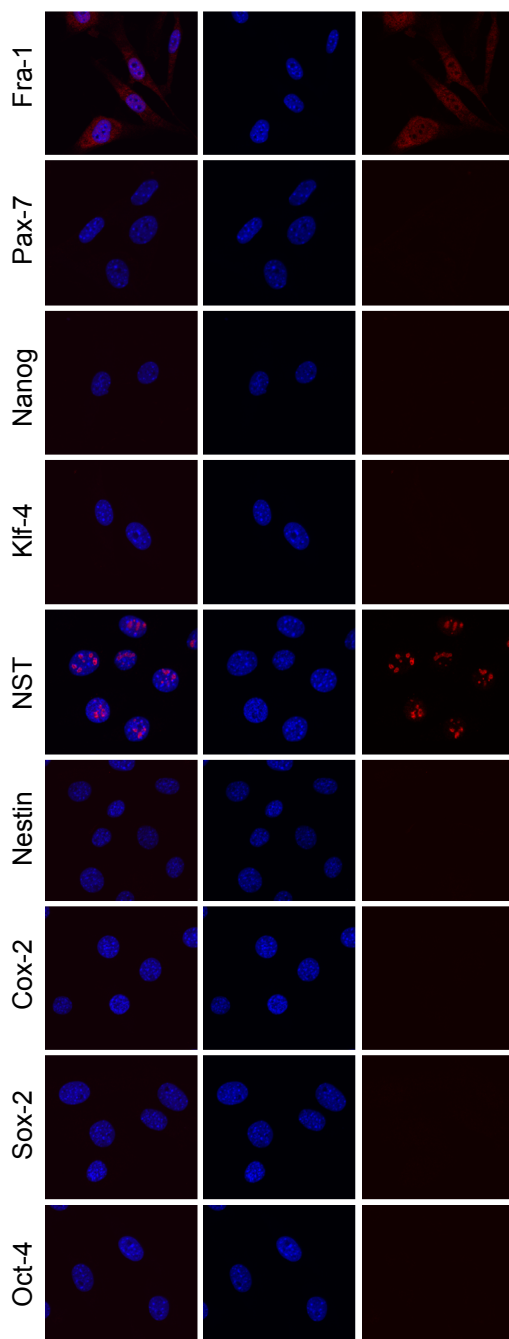

Fig. S3

A

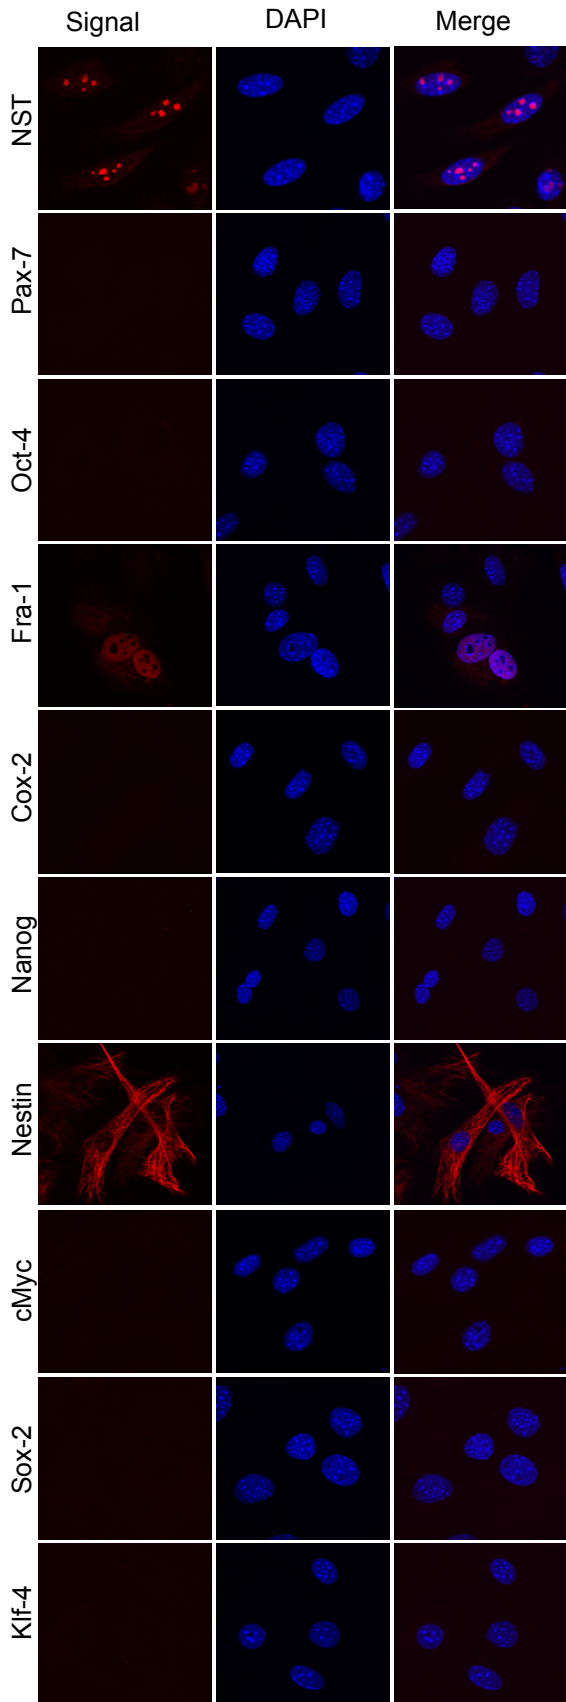

B

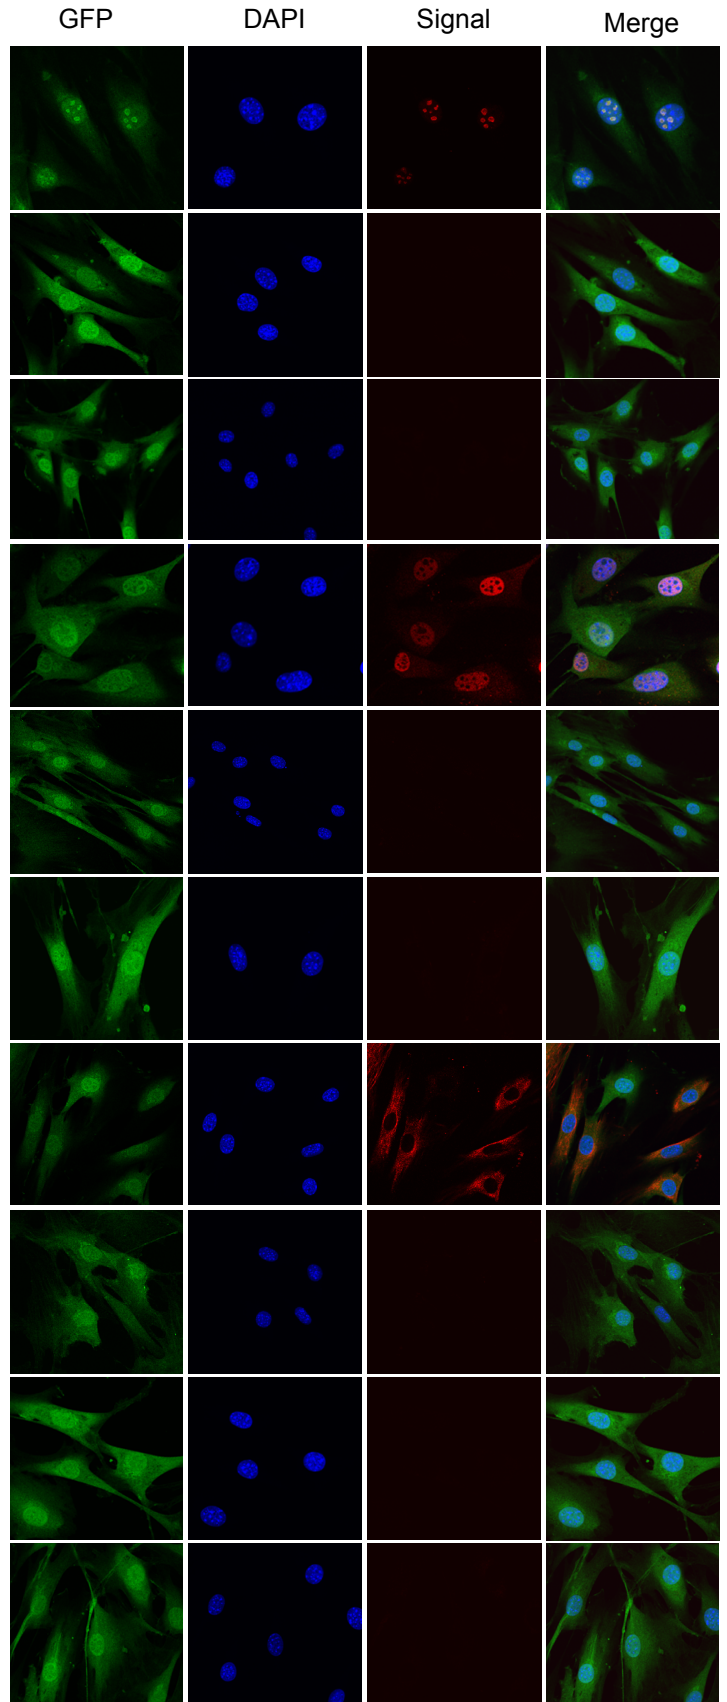

Fig. S4

A

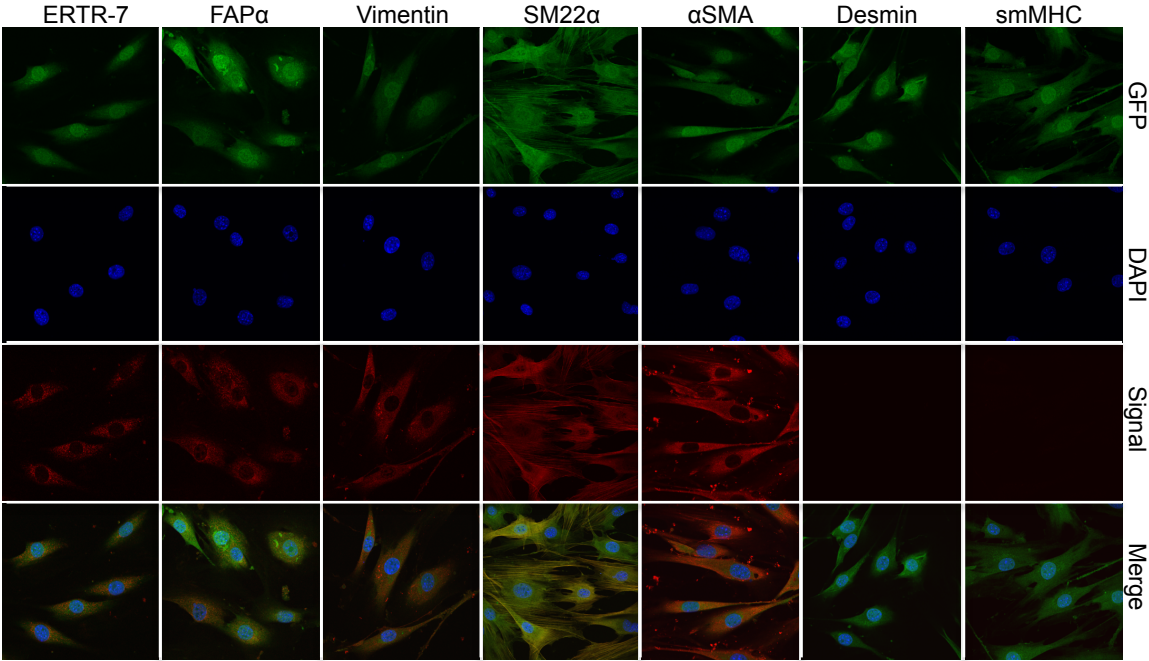

B

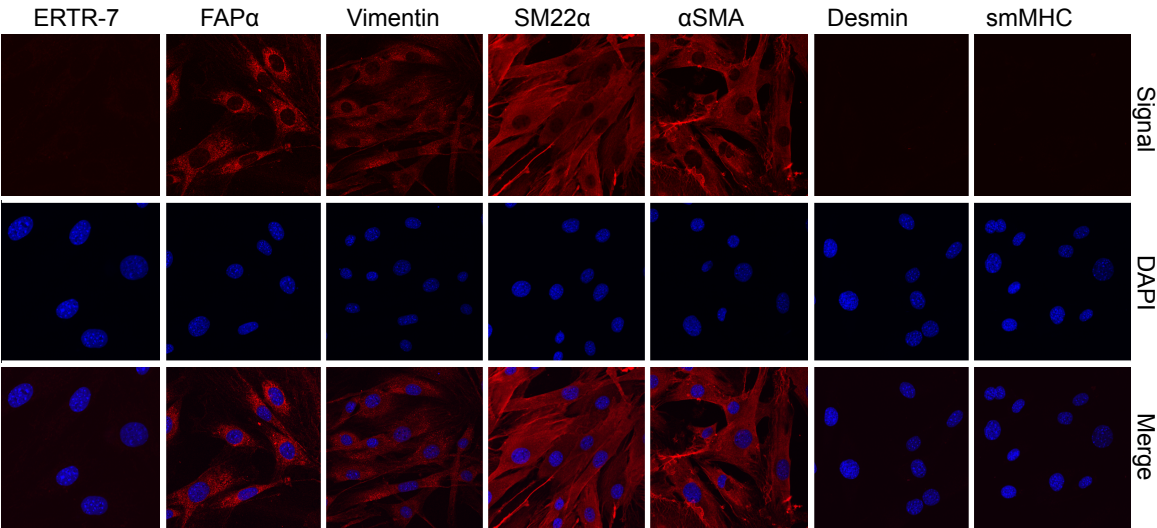

Fig. S5

A

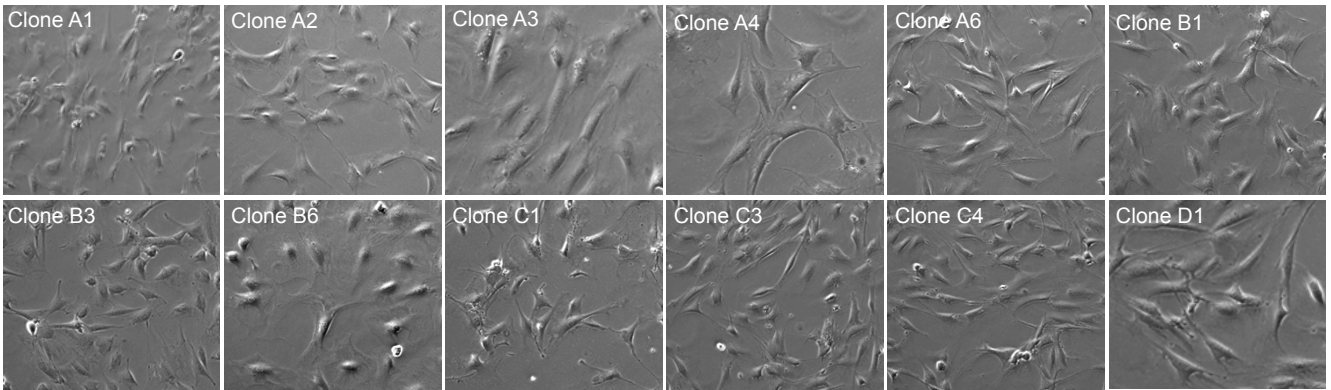

B

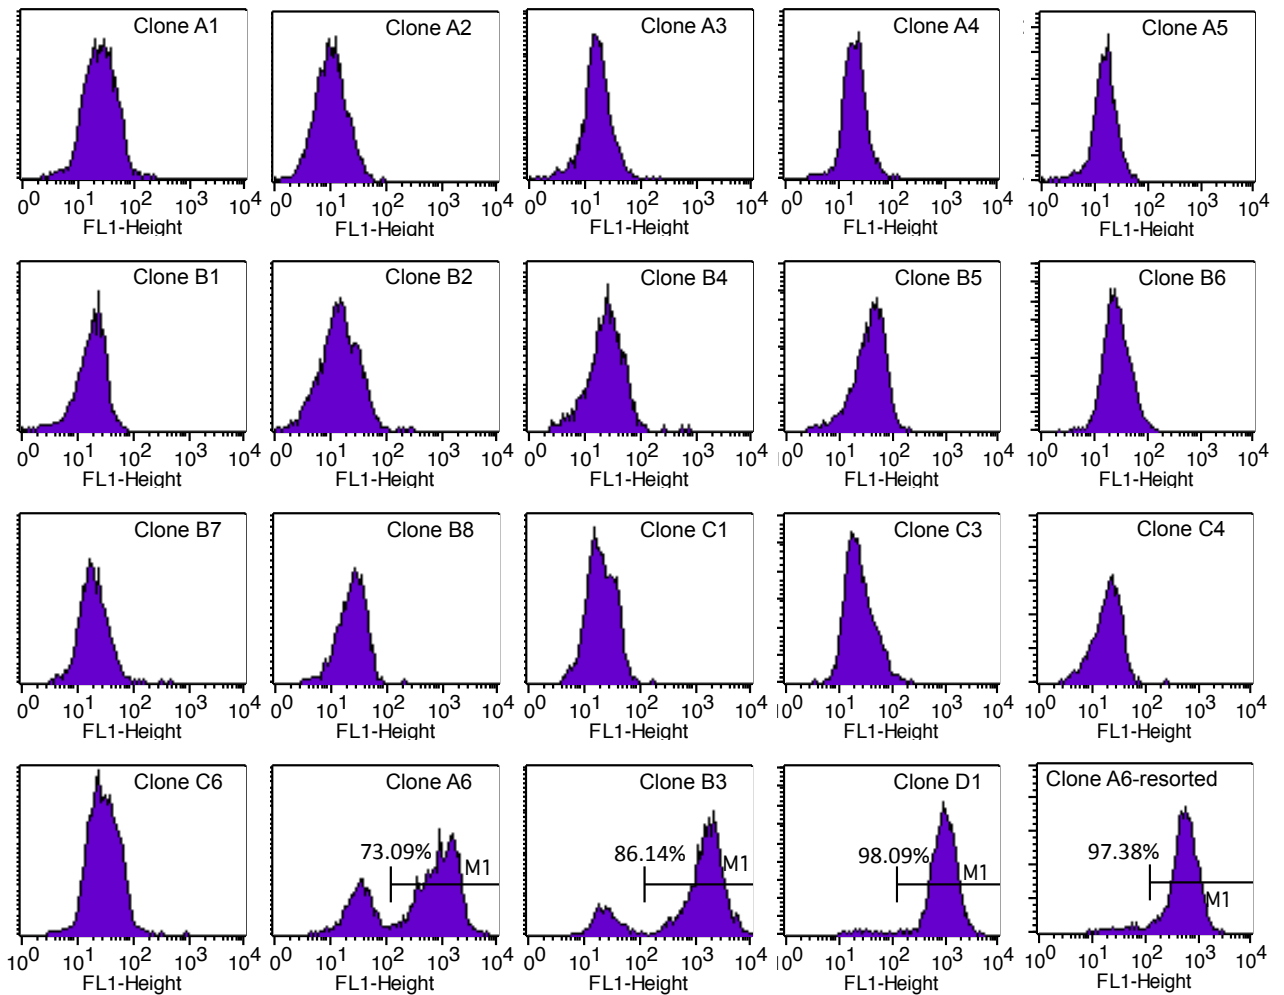



Fig. S6

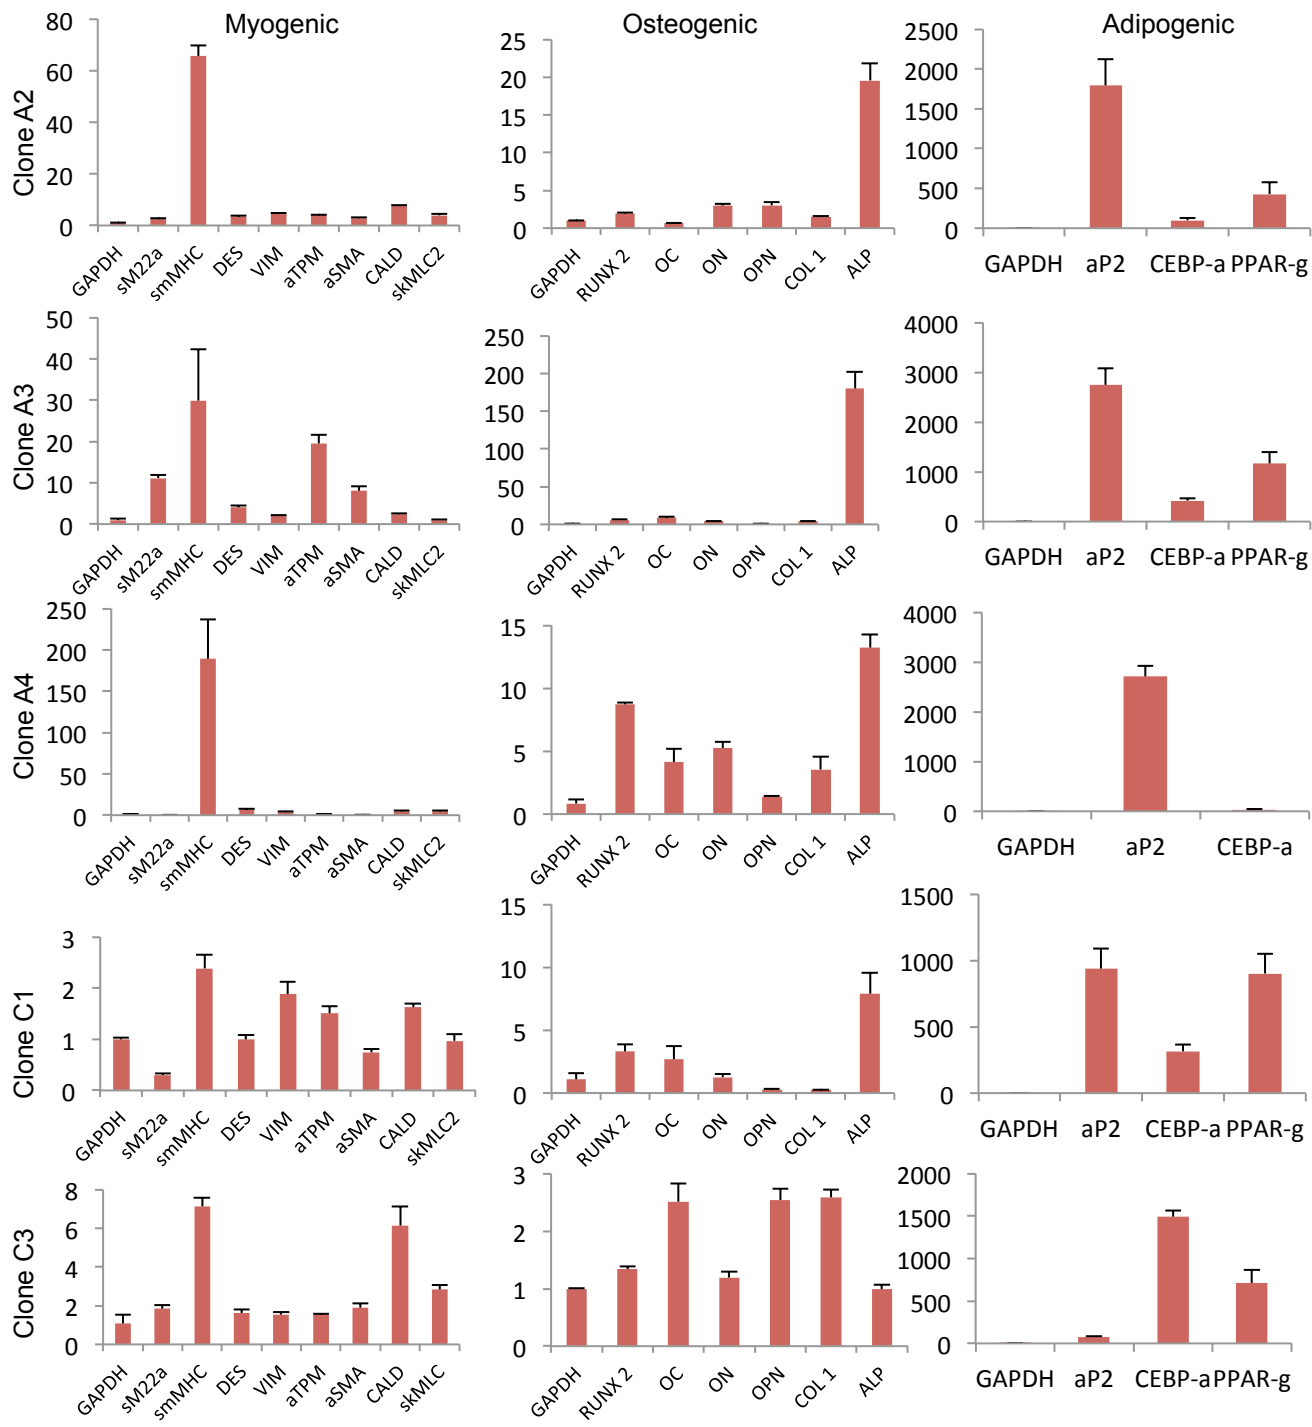

Fig. S7

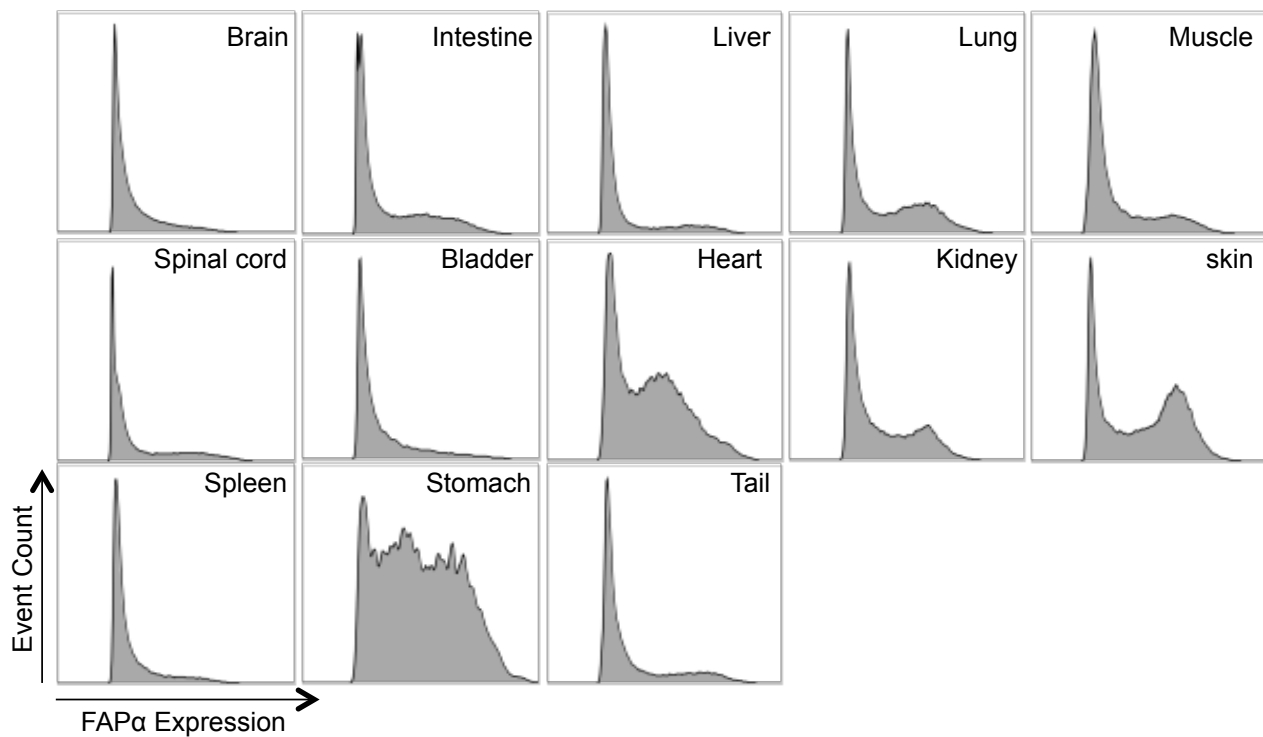

Fig. S8

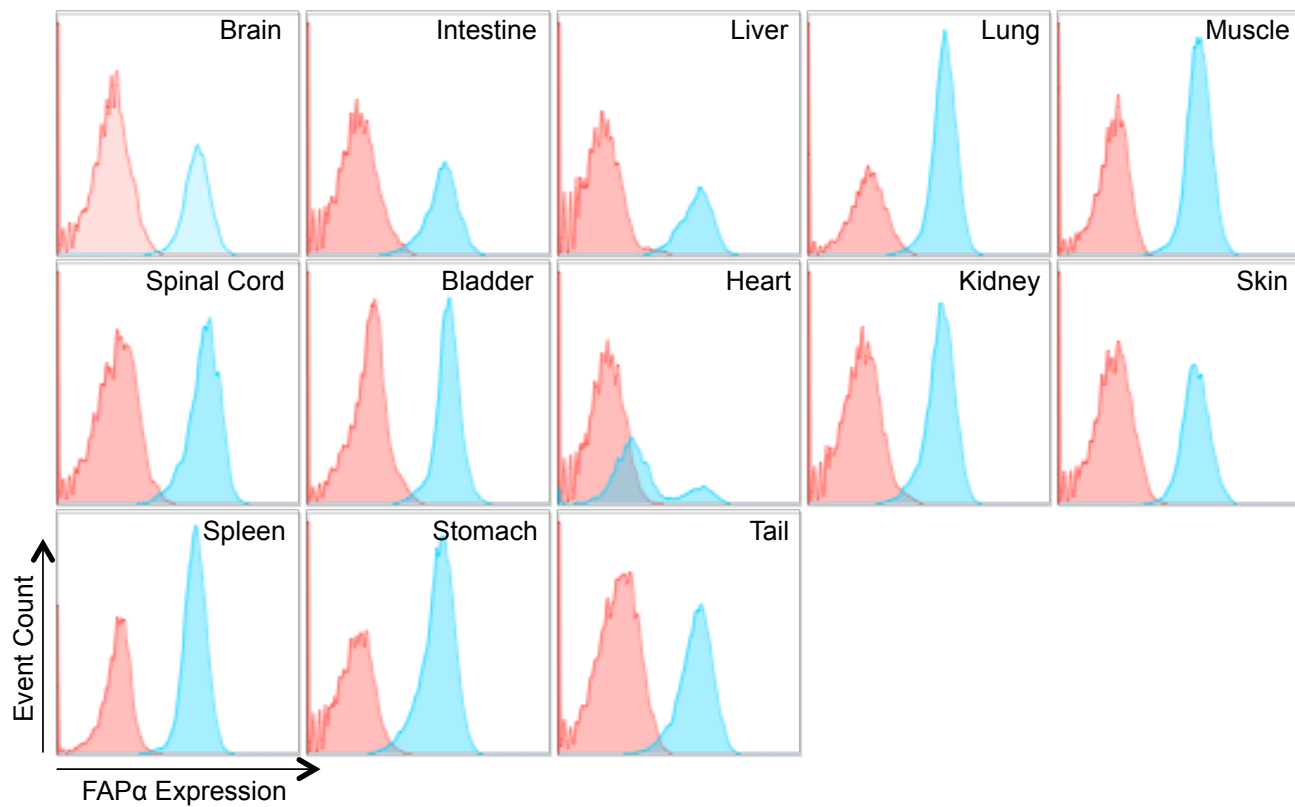

Fig. S9

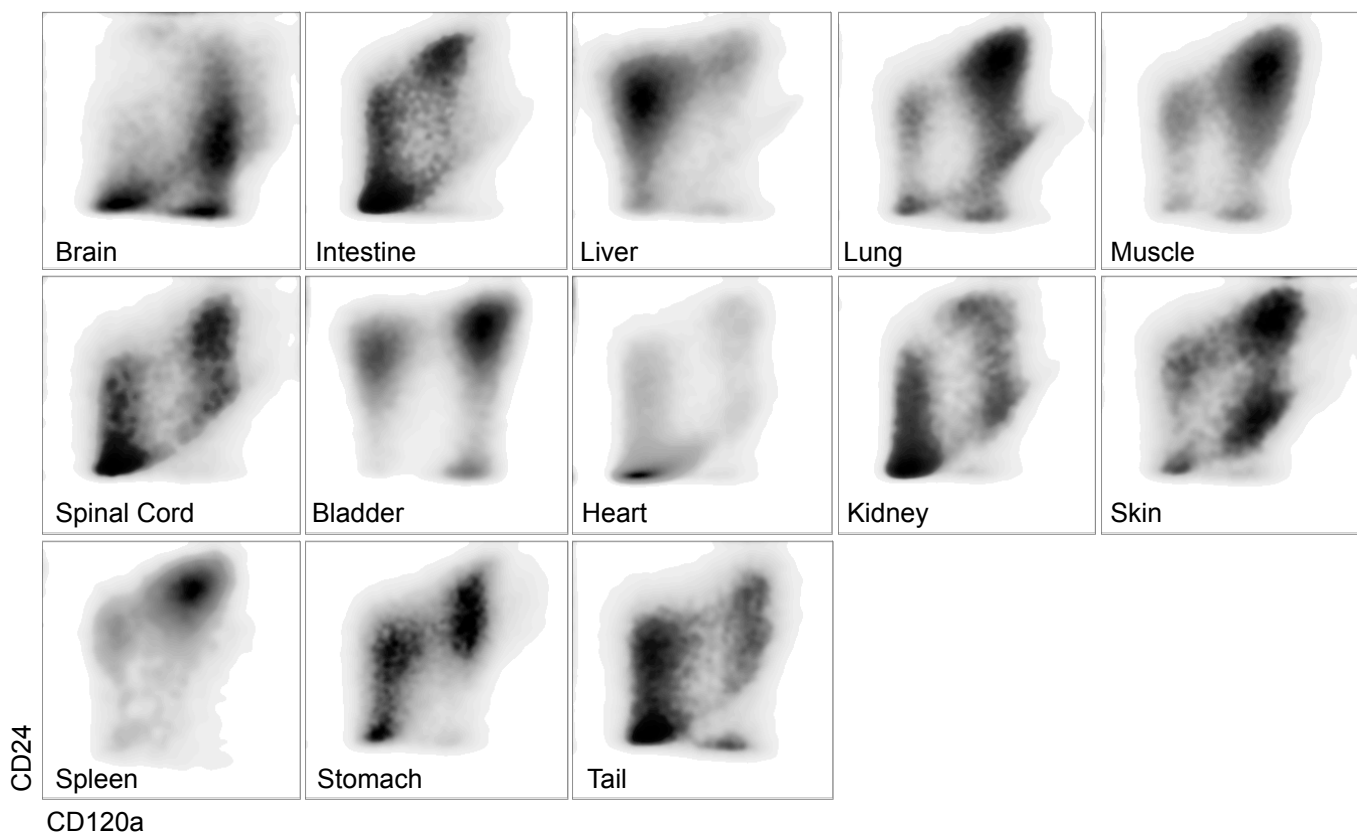

Fig. S10

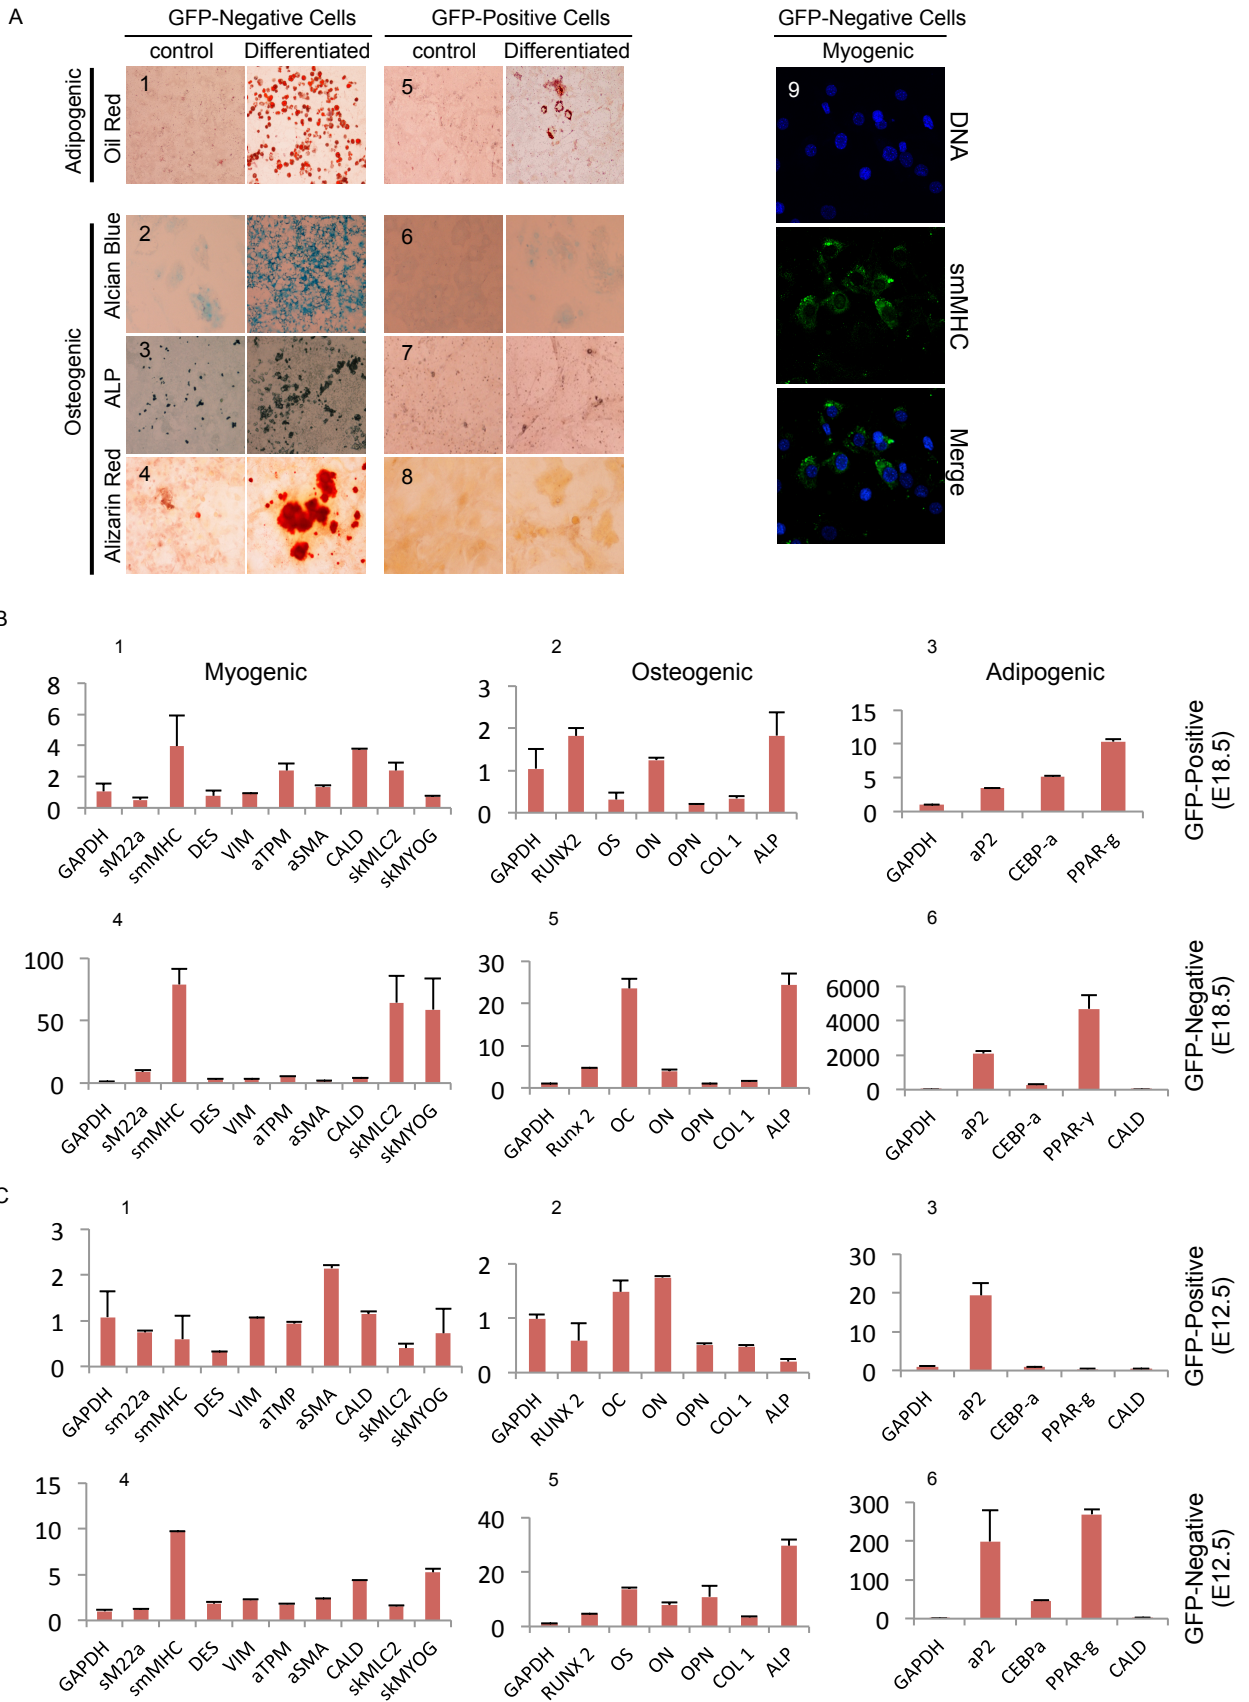

Fig. S11

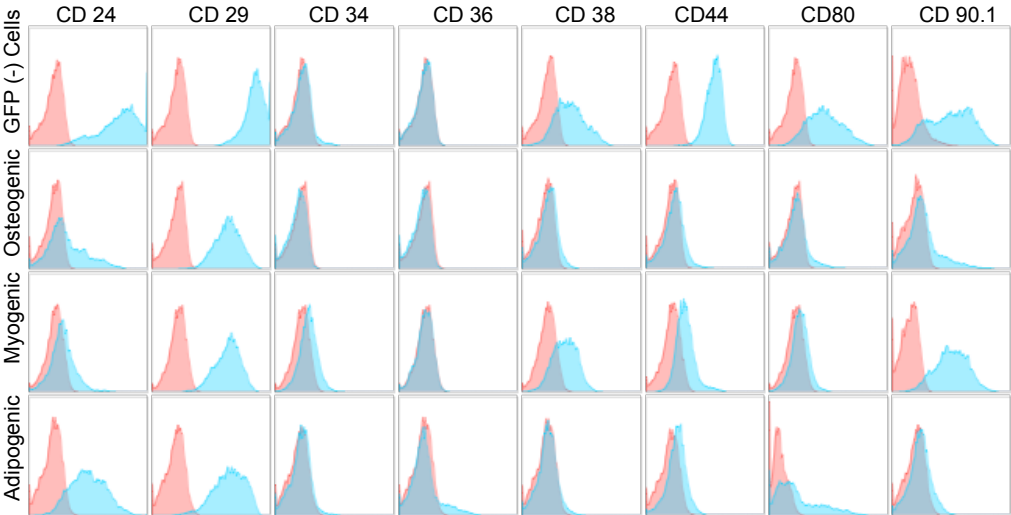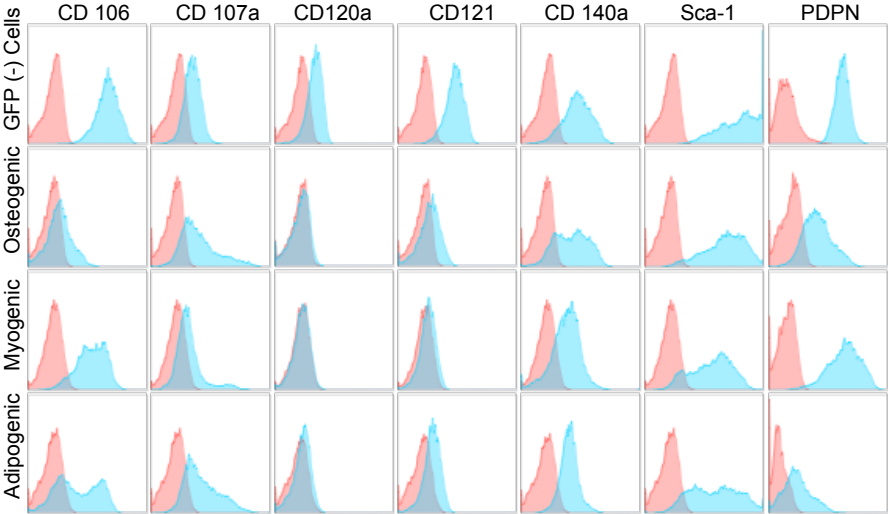

Fig. S12

A

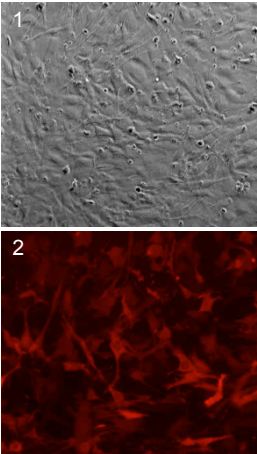

B

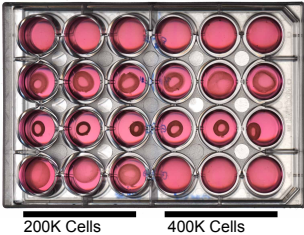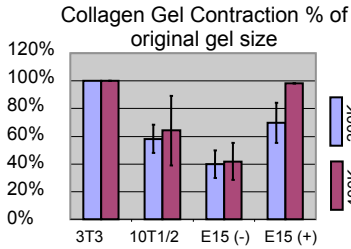

C

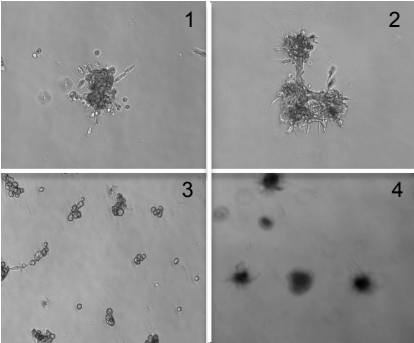

D

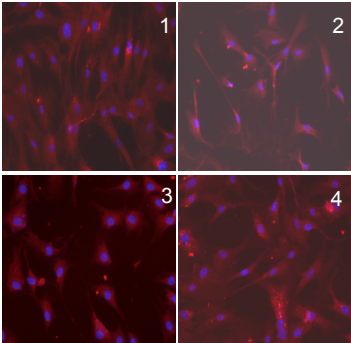

|            |              |             |              |            |         |
|------------|--------------|-------------|--------------|------------|---------|
| CD81       | Eat-2        | Biologend   | PE           | 104905     | B161589 |
| CD86       | GL-1         | Biologend   | APC          | 105011     | B165162 |
| CD88       | 20/70        | Biologend   | APC          | 135807     | B141845 |
| CD90.1     | OX-7         | Biologend   | APC          | 202526     | B142843 |
| CD90.2     | 30-H12       | Biologend   | APC          | 105311     | B141652 |
| CD96       | 3.3          | Biologend   | APC          | 131709     | B135887 |
| CD105      | MJ7/18       | Biologend   | APC          | 120413     | B134487 |
| CD106      | 429          | Biologend   | APC          | 105717     | B136773 |
| CD107a     | 1D4B         | Biologend   | APC          | 121613     | B130800 |
| CD117      | 2B8          | Biologend   | APC          | 105811     | B147157 |
| CD120a     | 55R-286      | Biologend   | APC          | 113006     | B171052 |
| CD121      | JAMA-147     | Biologend   | APC          | 113509     | B146865 |
| CD122      | 5H4          | eBioscience | PE           | 12-1221-81 | E000616 |
| CD123      | 5B11         | Biologend   | PE           | 106005     | B168602 |
| CD127      | A7R34        | Biologend   | APC          | 135011     | B142837 |
| CD133      | 315-2C11     | Biologend   | APC          | 141207     | B148289 |
| CD135      | A2F10        | Biologend   | APC          | 135309     | B141174 |
| CD140a     | APA5         | Biologend   | APC          | 135907     | B146656 |
| CD144      | BV13         | Biologend   | APC          | 138011     | B145963 |
| CD146      | ME-9F1       | Biologend   | APC          | 134711     | B182051 |
| CD150      | TC15-12F12.2 | Biologend   | APC          | 115909     | B123557 |
| CD202      | TEK4         | Biologend   | APC          | 124009     | B147798 |
| CD226      | 10E5         | Biologend   | PE           | 128805     | B121688 |
| CD309      | Avas12       | Biologend   | APC          | 136405     | B142806 |
| Podoplanin | 8.1.1        | Biologend   | APC          | 127409     | B139665 |
| Sca-1      | D7           | Biologend   | APC          | 108111     | B140513 |
| DLL1       | HMD1-3       | Biologend   | APC          | 128313     | B132325 |
| DLL4       | HMD4-1       | Biologend   | APC          | 130813     | B142335 |
| CD11c      | N418         | Biologend   | APC          | 117309     | B181249 |
| CD54       | YN1/1.7.4    | Biologend   | Pacific blue | 116116     | B183162 |
| Sca-1      | D7           | Biologend   | BV-510       | 108129     | B199632 |
| CD73       | TY/11.8      | Biologend   | BV-605       | 127215     | B189603 |
| CD80       | 16-10A1      | Biologend   | BV-650       | 104731     | B195752 |
| CD140a     | APA5         | Biologend   | PE           | 135906     | B177404 |
| CD38       | 90           | Biologend   | PE/Cy7       | 102718     | B168859 |
| CD107a     | 1D4B         | Biologend   | APC-Cy7      | 121616     | B192509 |
| CD90.1     | OX-7         | Biologend   | AF-700       | 202528     | B185299 |
| CD71       | R17217       | BioLegend   | PE/Cy7       | 113812     | B169143 |
| CD24       | M1/69        | BD          | PE-CF594     | 562477     | 4192822 |
